# Supplementary material for: cis and trans influences on [Pt(SRF)(triphos)]+ complexes (SRF = polyfluorobenzothiolate)
Source: Royal Society of Chemistry journal article supplement (doi:10.1039/c4nj01686f), 2014-11-03

***Cis* and *trans* influence on [Pt(SR<sub>F</sub>)(triphos)]<sup>+</sup> complexes  
(SR<sub>F</sub> = polyfluorobenzothiolate).**

Ruy Cervantes,<sup>a</sup> Jorge Tiburcio,<sup>b</sup> and Hugo Torrens.<sup>\*a</sup>

<sup>a</sup> Facultad de Química, Universidad Nacional Autónoma de México, 04510,  
México D.F., México.

<sup>b</sup> Departamento de Química, Cinvestav, Av. Instituto Politécnico Nacional 2508,  
San Pedro Zacatenco, 07360, México D.F., México.

Ruy Cervantes present address: Departamento de Química, CINVESTAV, Av.  
Instituto Politécnico Nacional 2508, San Pedro Zacatenco, 07360, México D.F.,  
México.

**NEW JOURNAL OF CHEMISTRY**

**MASS SPECTRA OF COMPOUNDS [Pt(SR<sub>F</sub>)(triphos)]OTf.**

Compuesto [Pt(SC<sub>6</sub>F<sub>4</sub>CF<sub>3</sub>.4)(triphos)]OTf (1)

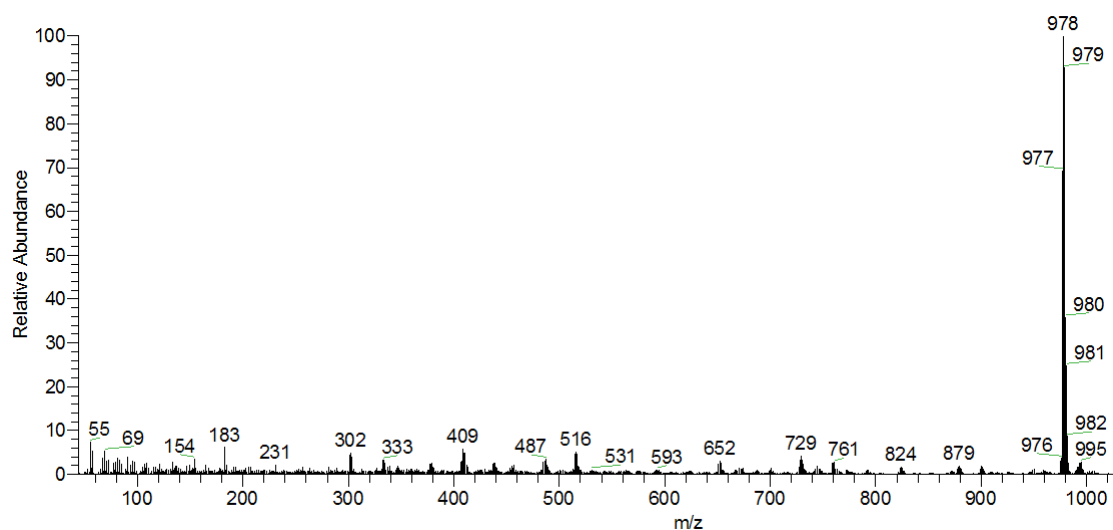

Compound [Pt(SC<sub>6</sub>F<sub>5</sub>)(triphos)]OTf (2)

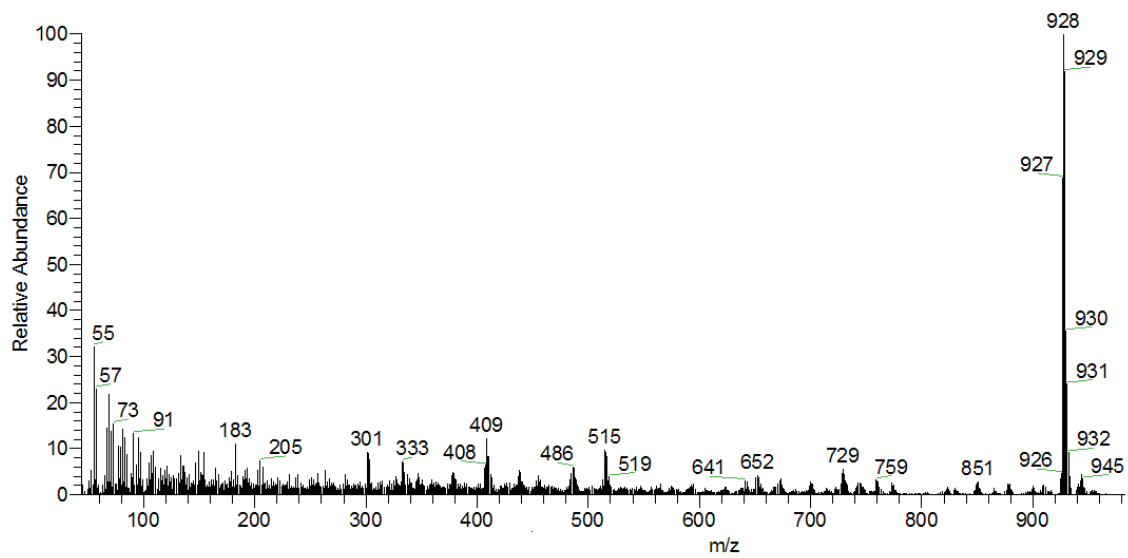

Compound [Pt(SC<sub>6</sub>HF<sub>4</sub>-4)(triphos)]OTf (3)

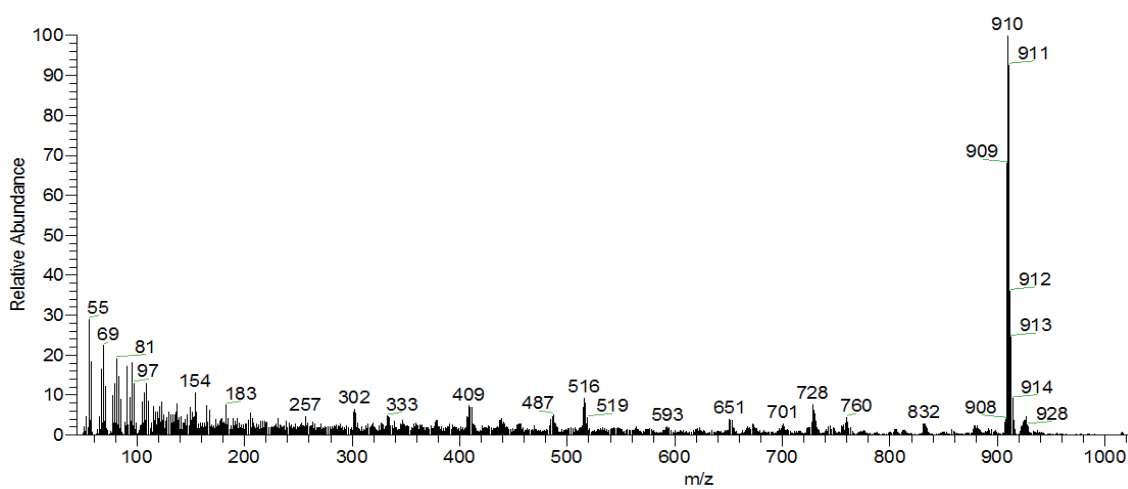

Compound [Pt(SC<sub>6</sub>H<sub>4</sub>CF<sub>3</sub>-4)(triphos)]OTf (4)

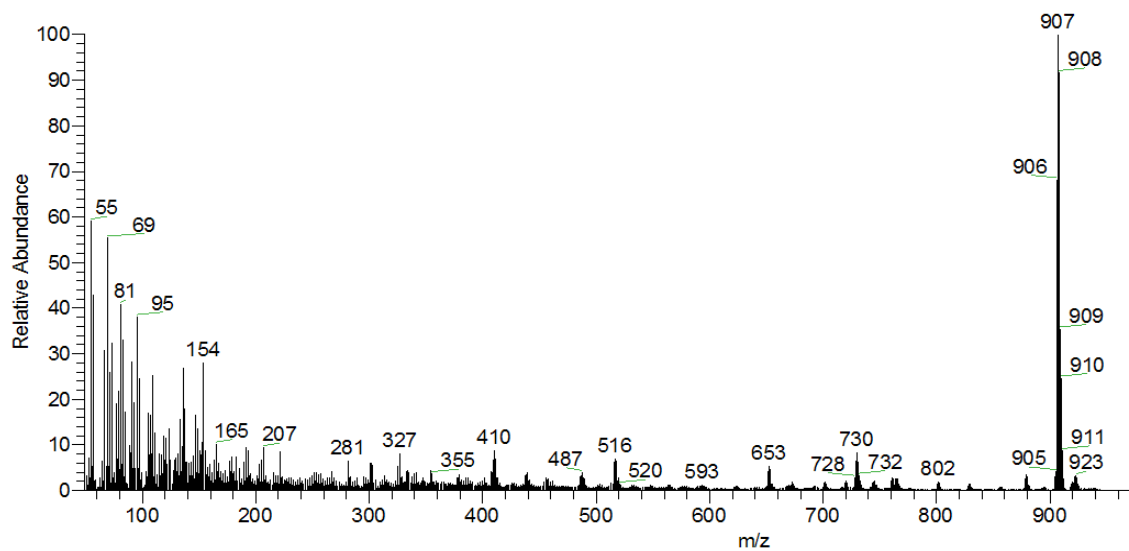

Compound [Pt(SC<sub>6</sub>H<sub>3</sub>F<sub>2</sub>-2,4)(triphos)]OTf (5)

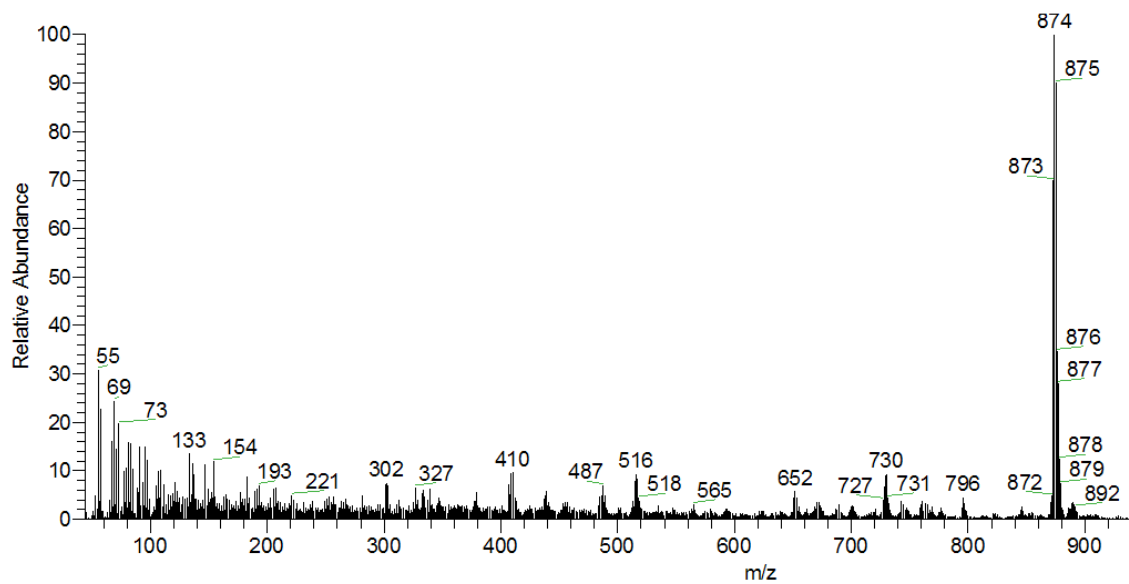

Compound [Pt(SC<sub>6</sub>H<sub>4</sub>F-2)(triphos)]OTf (6)

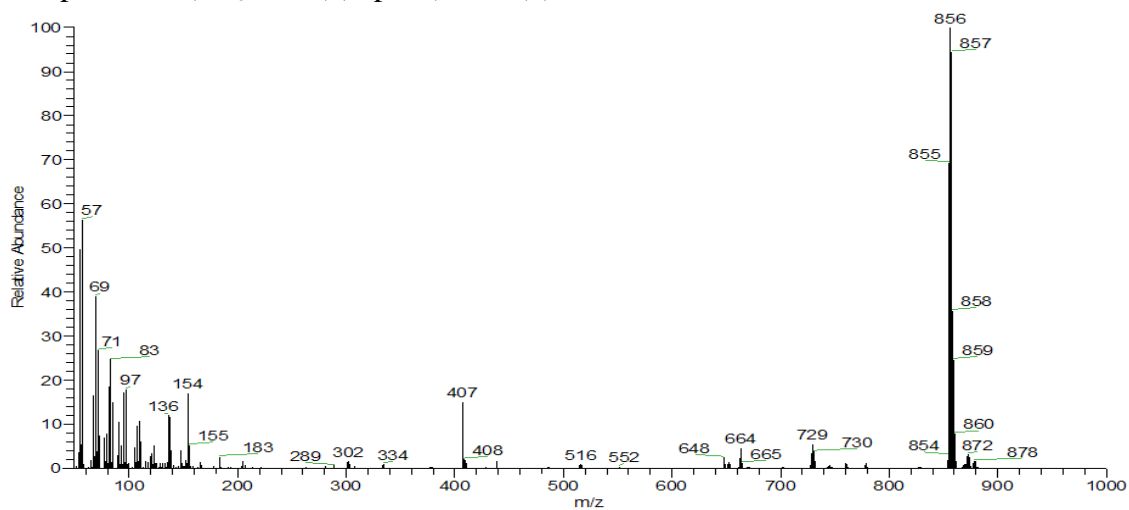

Compound [Pt(SC<sub>6</sub>H<sub>4</sub>F-4)(triphos)]OTf (7)

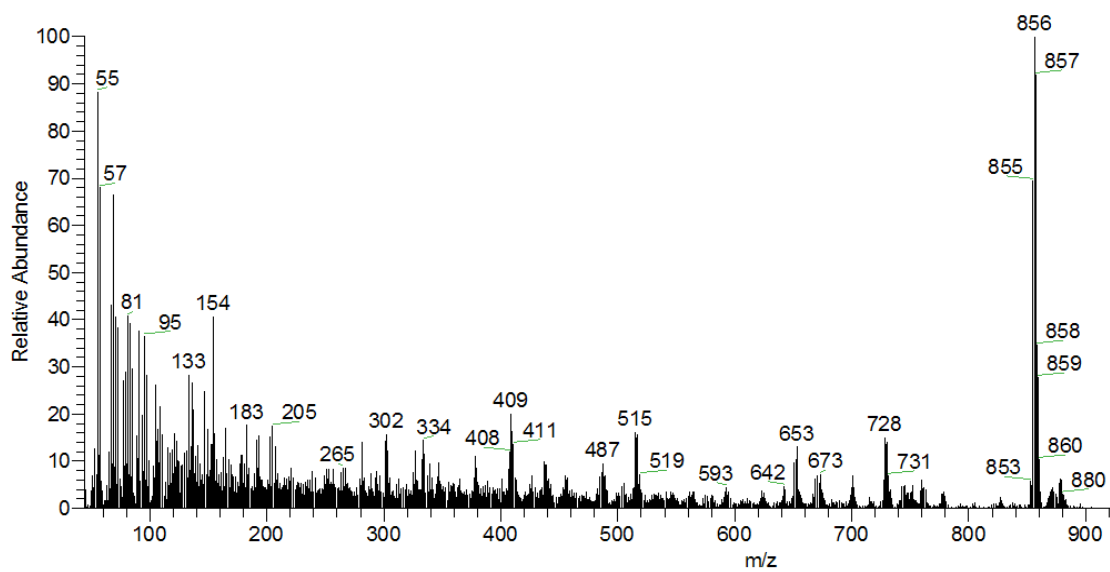

Compound [Pt(SC<sub>6</sub>H<sub>5</sub>)(triphos)]OTf (8)

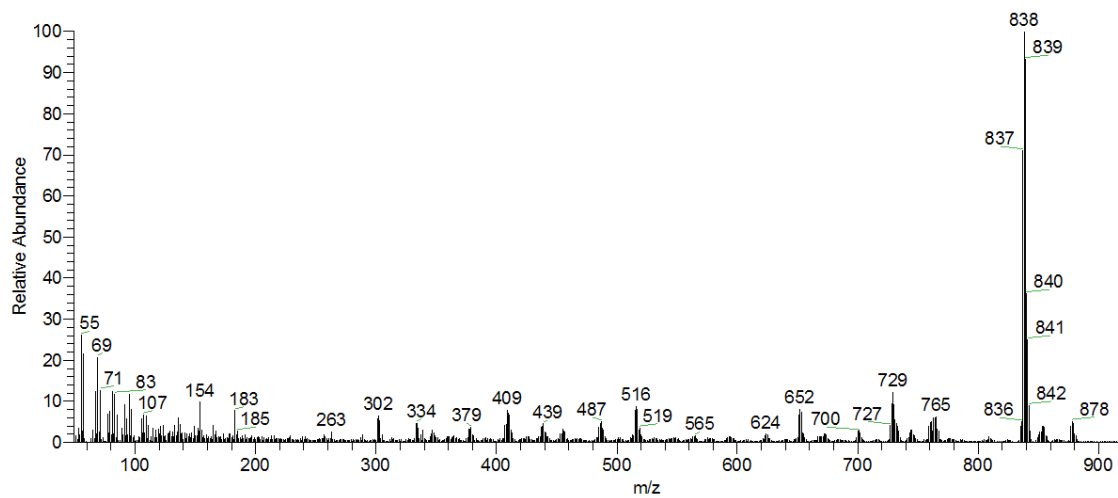

# $^{19}\text{F}$ NMR spectra of compounds $[\text{Pt}(\text{SR}_f)(\text{triphos})]\text{OTf}$ .

## $^{19}\text{F}$ NMR spectra of Compound $[\text{Pt}(\text{SC}_6\text{F}_4\text{CF}_3\text{-4})(\text{triphos})]\text{OTf}$ (1)

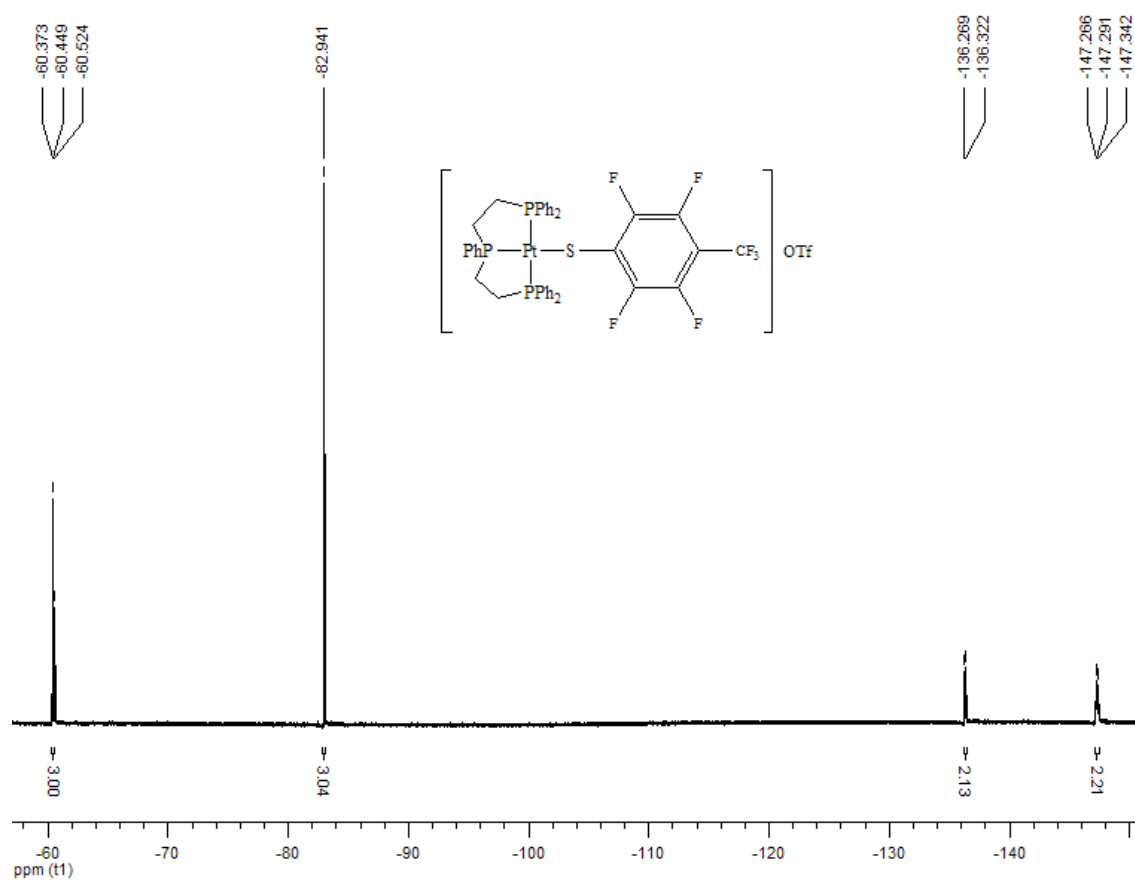

**$^{19}\text{F}$  NMR spectra of Compound  $[\text{Pt}(\text{SC}_6\text{F}_5)(\text{triphos})]\text{OTf}$  (2)**

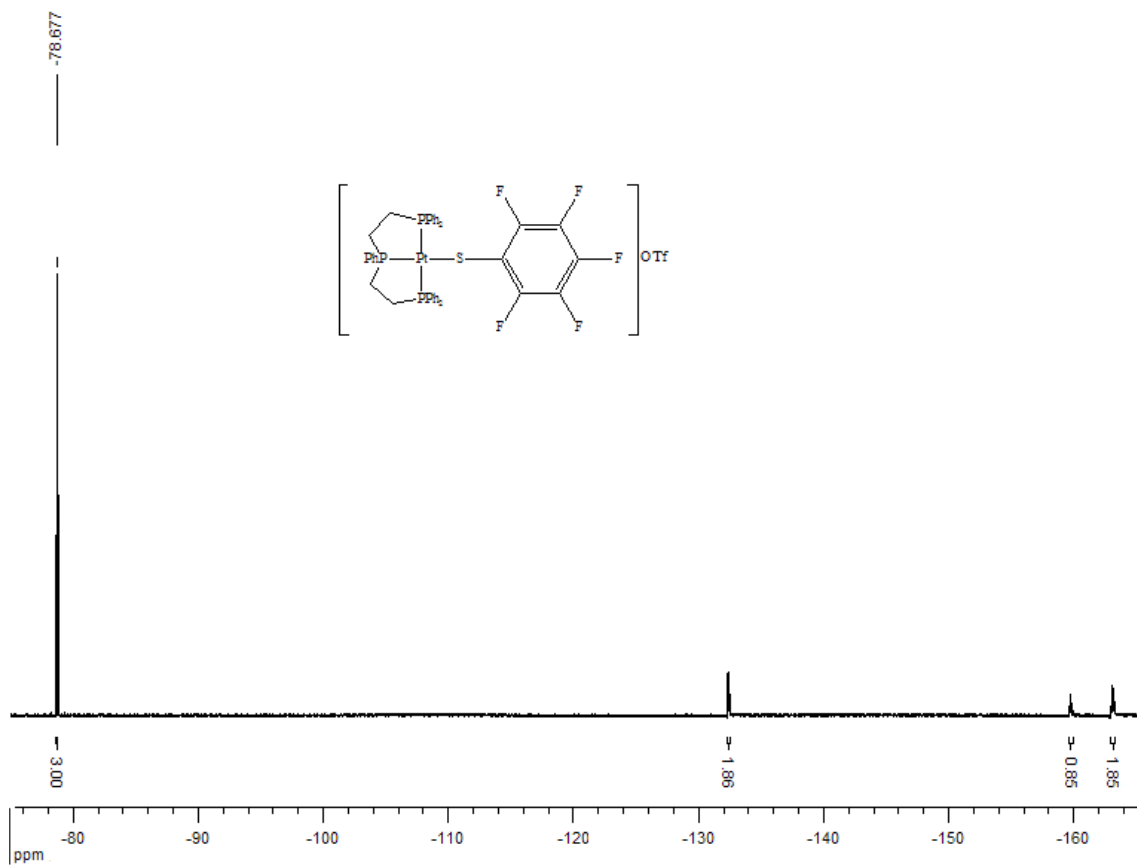

**$^{19}\text{F}$  NMR spectra of Compound  $[\text{Pt}(\text{SC}_6\text{HF}_4\text{-4})(\text{triphos})]\text{OTf}$  (3)**

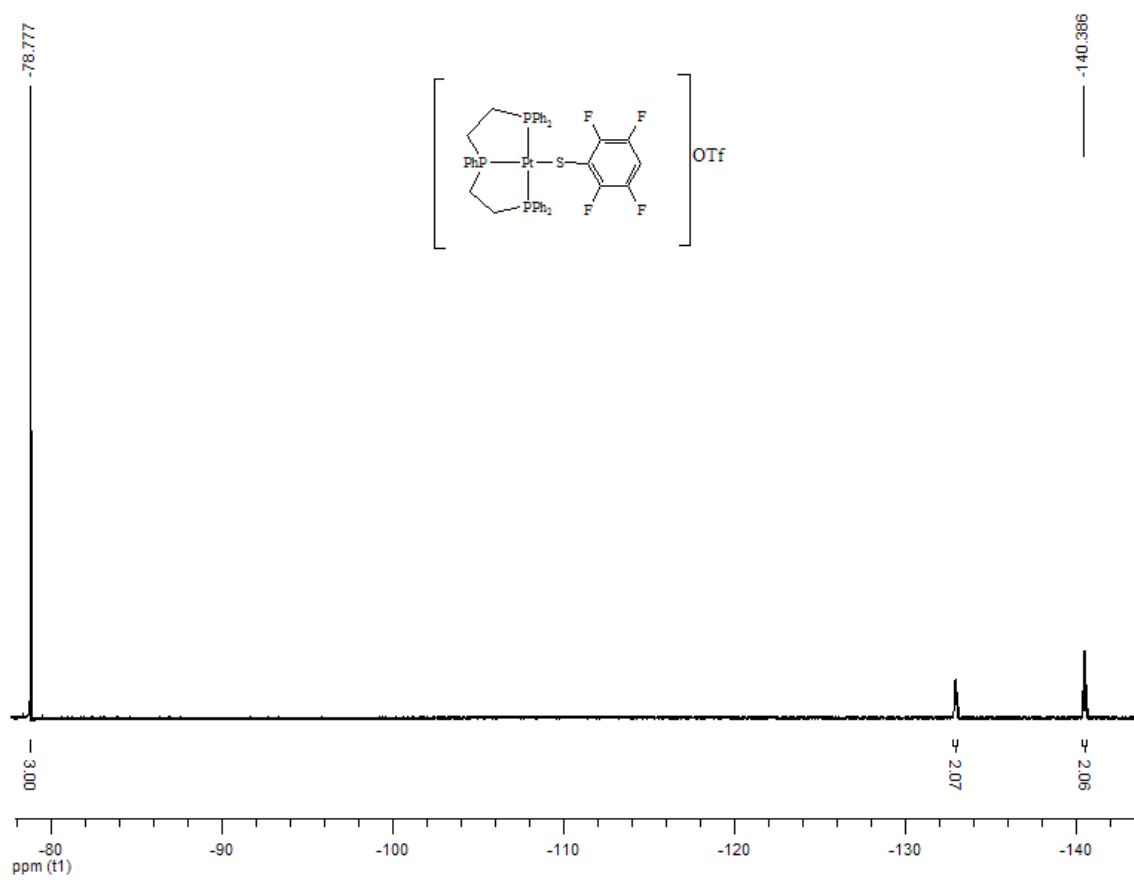



**$^{19}\text{F}$  NMR spectra of Compound  $[\text{Pt}(\text{SC}_6\text{H}_4\text{CF}_3\text{-4})(\text{triphos})]\text{OTf}$  (4)**

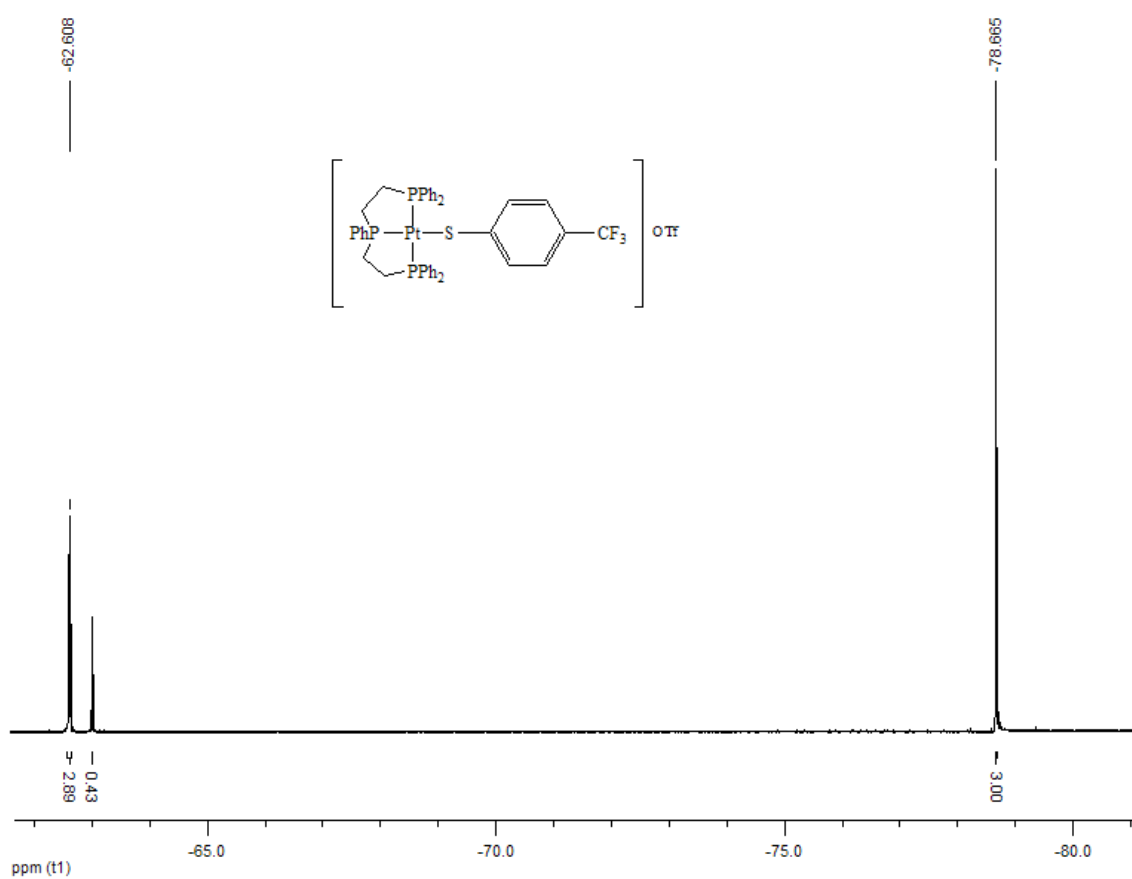

**<sup>19</sup>F NMR spectra of Compound [Pt(SC<sub>6</sub>H<sub>3</sub>F<sub>2</sub>-2,4)(triphos)]OTf (5)**

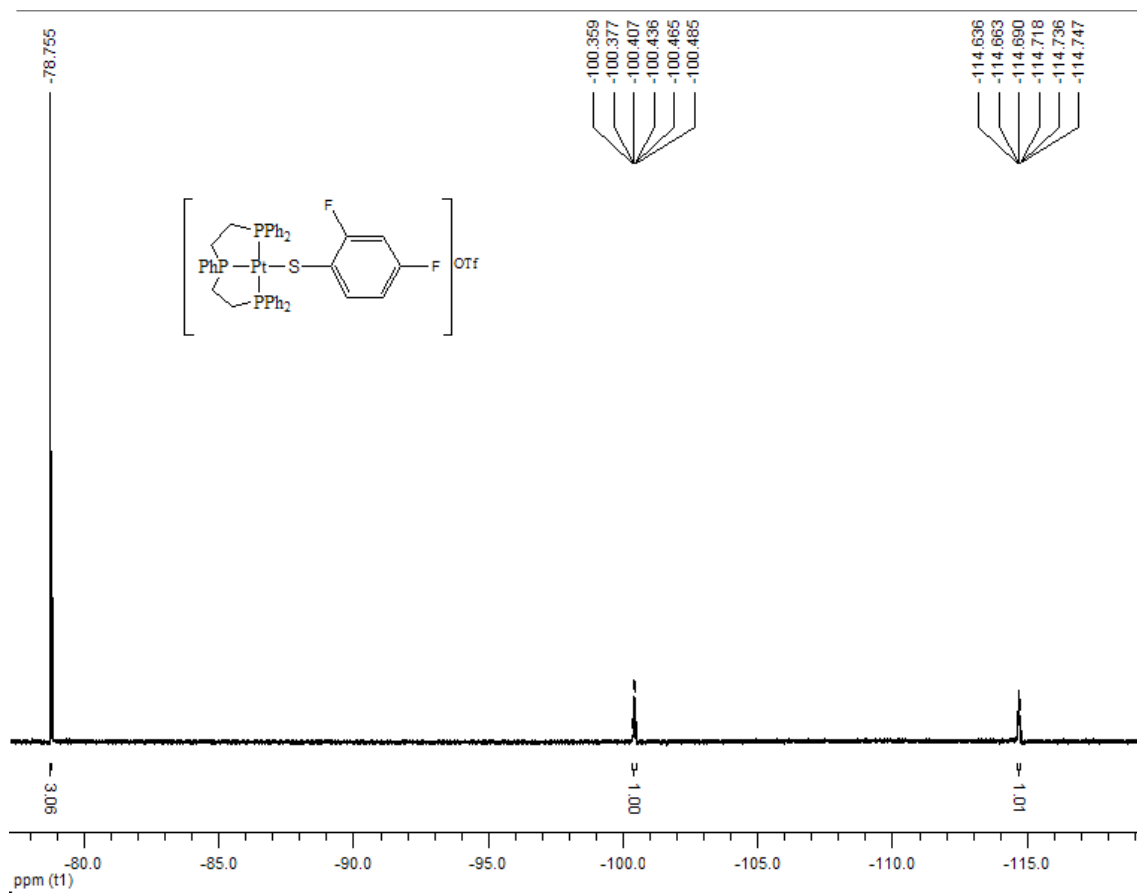

**$^{19}\text{F}$  NMR spectra of Compound  $[\text{Pt}(\text{SC}_6\text{H}_4\text{F}-2)(\text{triphos})]\text{OTf}$  (6)**

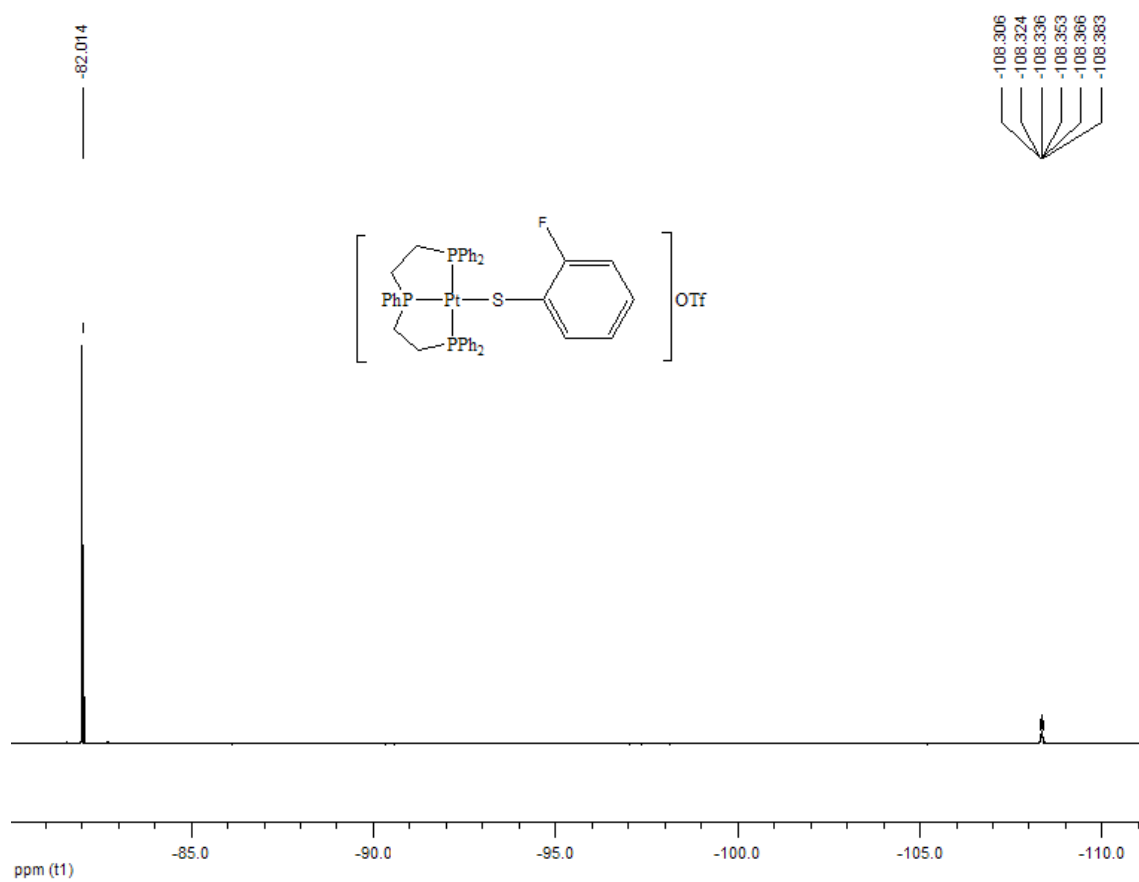

**$^{19}\text{F}$  NMR spectra of Compound  $[\text{Pt}(\text{SC}_6\text{H}_4\text{F-4})(\text{triphos})]\text{OTf}$  (7)**

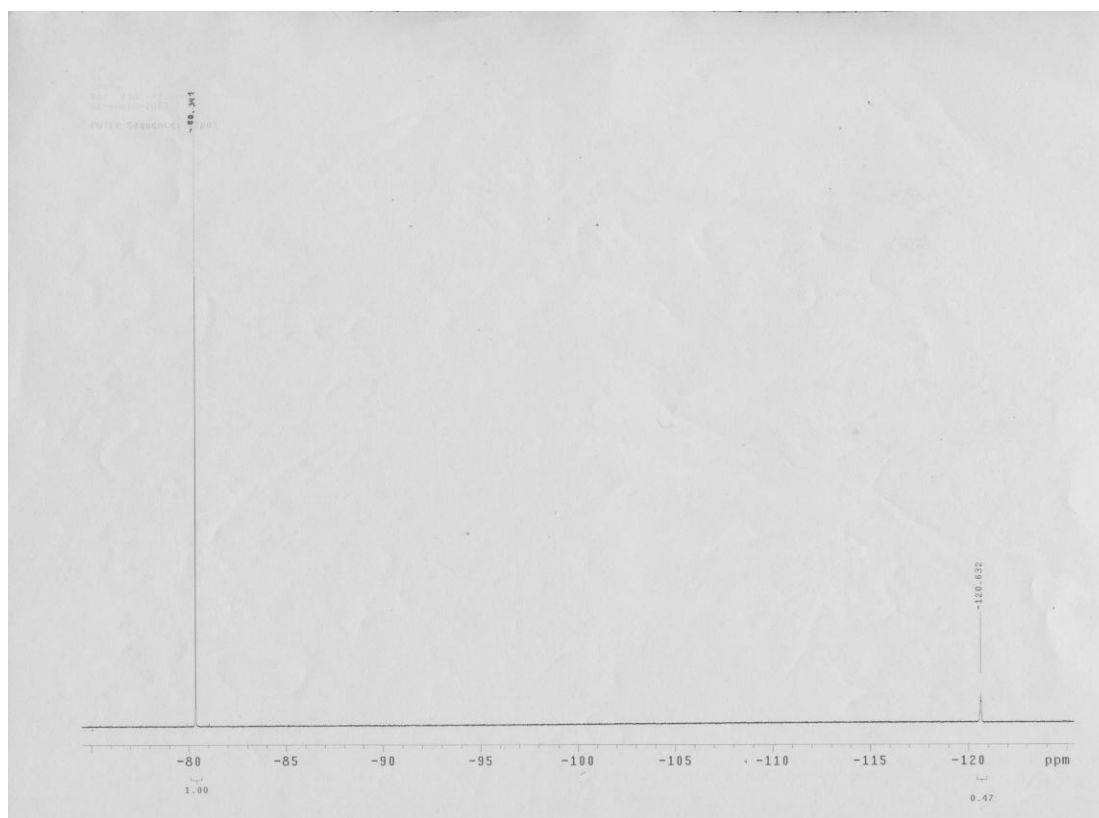

**<sup>19</sup>F NMR spectra of Compound [Pt(SC<sub>6</sub>H<sub>5</sub>)(triphos)]OTf (8)**

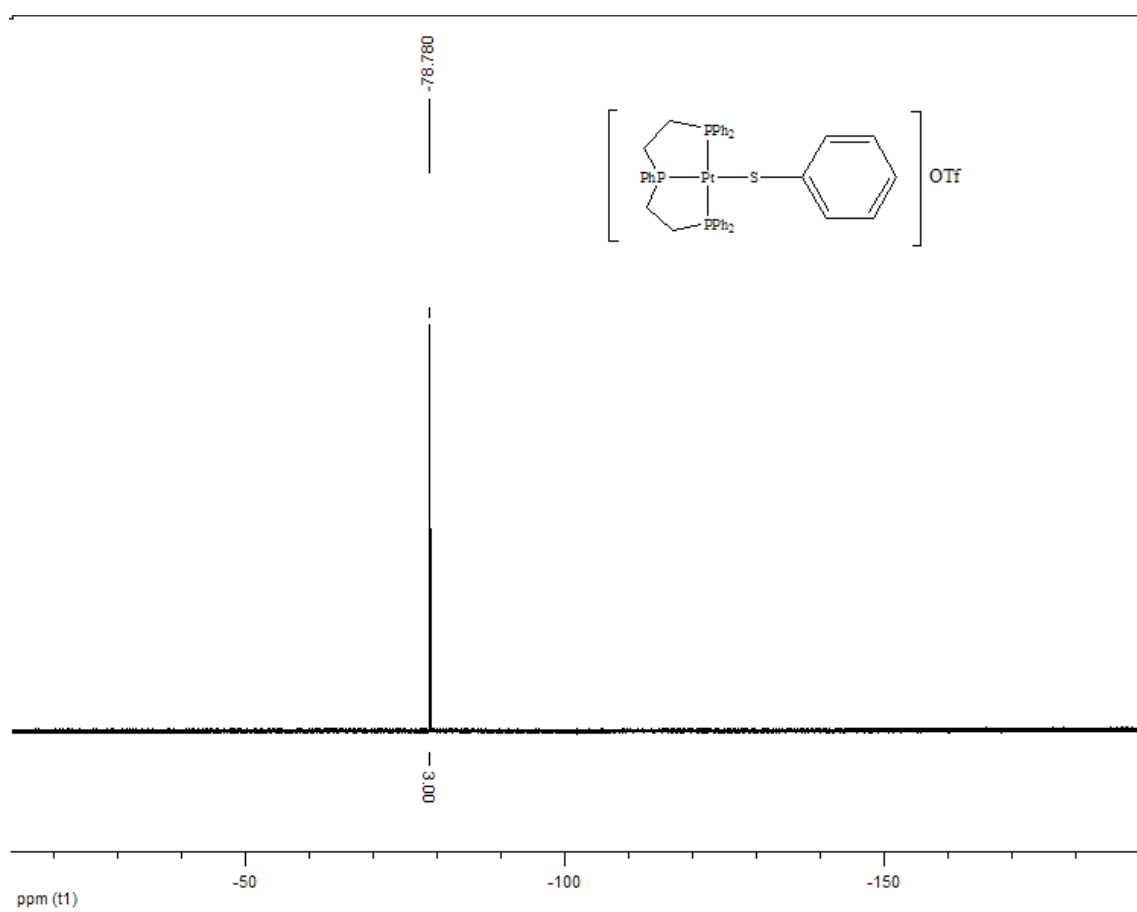

Supplement: c4nj01686f1.pdf [file c4nj01686f1.pdf]
